# Supplementary material
Source: ML conference proceedings conference paper supplement (https://openaccess.thecvf.com/content/ICCV2021/html/Chen_Dual_Bipartite_Graph_ICCV_2021_paper.html)
Supplement: Supplementary file 1 [file Chen_Dual_Bipartite_Graph_ICCV_2021_supplemental.pdf]

# Supplementary Material for “Dual Bipartite Graph Learning: A General Approach for Domain Adaptive Object Detection”

Chaoqi Chen<sup>1</sup>, Jiongcheng Li<sup>2</sup>, Zebiao Zheng<sup>2</sup>, Yue Huang<sup>2</sup>, Xinghao Ding<sup>2</sup>, Yizhou Yu<sup>1\*</sup>

<sup>1</sup>The University of Hong Kong    <sup>2</sup>Xiamen University

cqchen1994@gmail.com, jiongchengli@stu.xmu.edu.cn, zbzhen@stu.xmu.edu.cn

huangyue05@gmail.com, dxh@xmu.edu.cn, yizhouy@acm.org

**Definition 1. Source and Target Risks.** The source risk  $R_s(h)$  and target risk  $R_t(h)$  of  $h$  w.r.t.  $\mathcal{L}$  under source distribution  $P$  and target distribution  $Q$  are defined as:

$$\begin{aligned} R_s(h) &\triangleq \mathbb{E}_{(x,y) \sim P} \mathcal{L}(h(x), y) = \sum_{i=1}^{K+1} \pi_i^s R_{s,i}(h) \\ R_t(h) &\triangleq \mathbb{E}_{(x,y) \sim Q} \mathcal{L}(h(x), y) = \sum_{j=1}^{K+1} \pi_j^t R_{t,j}(h) \end{aligned} \quad (1)$$

where  $\pi_i^s = P(y = i)$  and  $\pi_j^t = Q(y = j)$  are class-prior probabilities of  $P$  and  $Q$ . Then, we have

$$\begin{aligned} R_s(h) &= \sum_{i=1}^K \pi_i^s R_{s,i}(h) + \pi_{K+1}^s R_{s,K+1}(h) = R_s^*(h) + \Delta_s \\ R_t(h) &= \sum_{j=1}^K \pi_j^t R_{t,j}(h) + \pi_{K+1}^t R_{t,K+1}(h) = R_t^*(h) + \Delta_t \end{aligned} \quad (2)$$

**Definition 2.  $\mathcal{H}\Delta\mathcal{H}$ -Distance.** For any  $h, h' \in \mathcal{H}$ , the domain discrepancy between source and target distributions can be defined as:

$$d_{\mathcal{H}\Delta\mathcal{H}}(P, Q) \triangleq \sup_{h, h' \in \mathcal{H}} |\mathbb{E}_P \mathcal{L}(h, h') - \mathbb{E}_Q \mathcal{L}(h, h')| \quad (3)$$

**Definition 3. Ideal Joint Hypothesis.** Let  $\mathcal{H}$  be the hypothesis class, the ideal joint hypothesis is the hypothesis which minimizes the combined error,

$$h^* = \arg \min_{h \in \mathcal{H}} R_s^*(h) + R_t^*(h) \quad (4)$$

Given the hypothesis space  $\mathcal{H}$  with a condition that constant function  $K + 1 \in \mathcal{H}$ , for  $\forall h \in \mathcal{H}$ , the expected error on target samples  $R_t(h)$  is bounded as,

$$\begin{aligned} \frac{R_t(h)}{1 - \pi_{K+1}^t} &\leq R_s^*(h) + d_{\mathcal{H}\Delta\mathcal{H}}(P_{X|Y \leq K}, Q_{X|Y \leq K}) + \lambda \\ &\quad + \frac{\Delta_t}{1 - \pi_{K+1}^t} \end{aligned} \quad (5)$$

where the shared error  $\lambda = \min_{h \in \mathcal{H}} \frac{R_t^*(h)}{1 - \pi_{K+1}^t} + R_s^*(h)$ ,  $R_s^*(h) = \sum_{i=1}^K \pi_i^s R_{s,i}(h)$ , and  $\Delta_t = \pi_{K+1}^t R_{t,K+1}(h)$ . We show the derivation of Inequality (5) as follows.

*Proof.* Given the above definitions, we have

$$\begin{aligned} R_t(h) &= R_t^*(h) + \Delta_t \\ &\leq R_t^*(h^*) + (1 - \pi_{K+1}^t) \mathbb{E}_{Q_{X|Y \leq K}} \mathcal{L}(h, h^*) + \Delta_t \\ &\leq R_t^*(h^*) + (1 - \pi_{K+1}^t) (\mathbb{E}_{P_{X|Y \leq K}} \mathcal{L}(h, h^*) \\ &\quad + d_{\mathcal{H}\Delta\mathcal{H}}(P_{X|Y \leq K}, Q_{X|Y \leq K})) + \Delta_t \end{aligned} \quad (6)$$

According to the triangle inequality, we have

$$\begin{aligned} \mathbb{E}_{P_{X|Y \leq K}} \mathcal{L}(h, h^*) &\leq \mathbb{E}_{P_{X|Y \leq K}} \mathcal{L}(h, i) + \mathbb{E}_{P_{X|Y \leq K}} \mathcal{L}(h^*, i) \\ &\leq R_s^*(h) + R_s^*(h^*) \end{aligned}$$

Then, the Eq. (6) can be formulated as,

$$\begin{aligned} R_t(h) &\leq R_t^*(h^*) + (1 - \pi_{K+1}^t) (R_s^*(h) + R_s^*(h^*)) \\ &\quad + d_{\mathcal{H}\Delta\mathcal{H}}(P_{X|Y \leq K}, Q_{X|Y \leq K}) + \Delta_t \end{aligned}$$

Finally, we have

$$\begin{aligned} \frac{R_t(h)}{1 - \pi_{K+1}^t} &\leq \frac{R_t^*(h^*)}{1 - \pi_{K+1}^t} + R_s^*(h) + R_s^*(h^*) \\ &\quad + d_{\mathcal{H}\Delta\mathcal{H}}(P_{X|Y \leq K}, Q_{X|Y \leq K}) + \frac{\Delta_t}{1 - \pi_{K+1}^t} \\ &= R_s^*(h) + d_{\mathcal{H}\Delta\mathcal{H}}(P_{X|Y \leq K}, Q_{X|Y \leq K}) + \lambda + \frac{\Delta_t}{1 - \pi_{K+1}^t} \end{aligned}$$

where the shared error  $\lambda = \min_{h \in \mathcal{H}} \frac{R_t^*(h)}{1 - \pi_{K+1}^t} + R_s^*(h)$ .  $\square$

\*Corresponding author
